# Supplementary material for: A library of Neo Open Reading Frame peptides (NOPs) as a sustainable resource of common neoantigens in up to 50% of cancer patients
Source: PubMed Central journal article supplement (PMC6488612; doi:10.1038/s41598-019-42729-2), 2019-04-29
Supplement: 41598_2019_42729_MOESM1_ESM.pdf [file 41598_2019_42729_MOESM1_ESM.pdf]

A library of Neo Open Reading Frame peptides (NOPs) as a sustainable resource of common neoantigens in up to 50% of cancer patients

Jan Koster and Ronald H.A. Plasterk

BAP1-NM\_004656  
Somatic SNVs

5

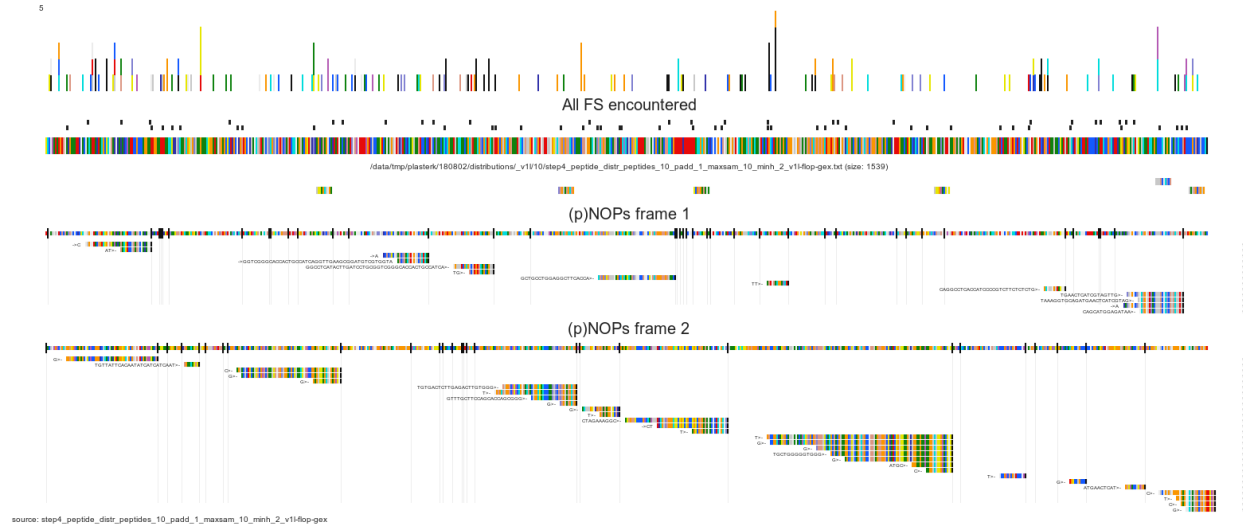

CIC-NM\_015125  
Somatic SNVs

15

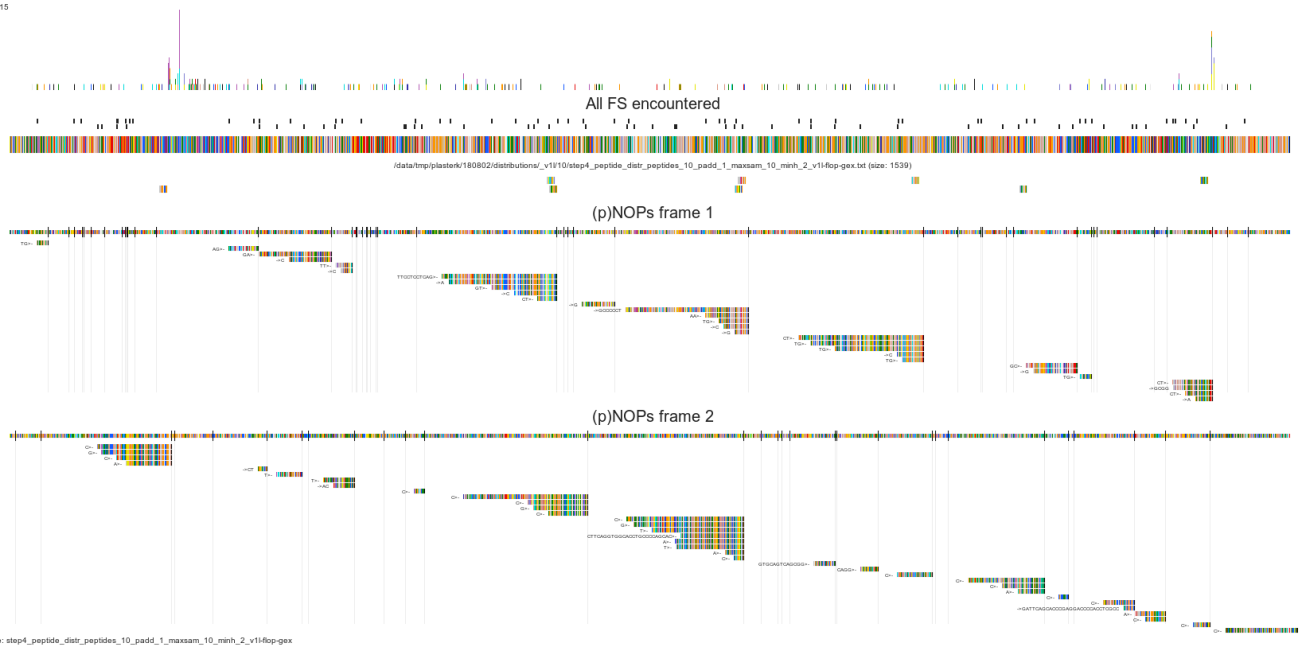

**Supplemental Figure 1. Examples of NOPs**  
Small selection of genes containing NOPs of 10 or more amino acids

GATA3-NM\_001002295  
Somatic SNVs

6

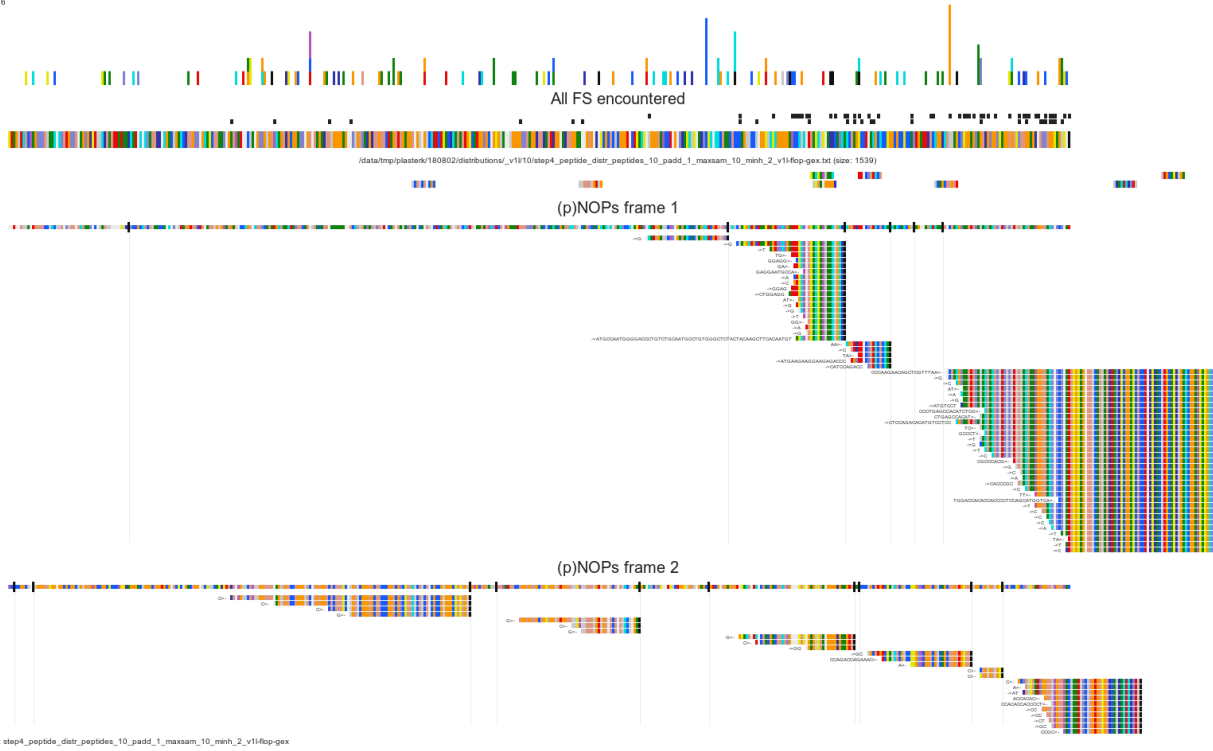

RB1-NM\_000321  
Somatic SNVs

8

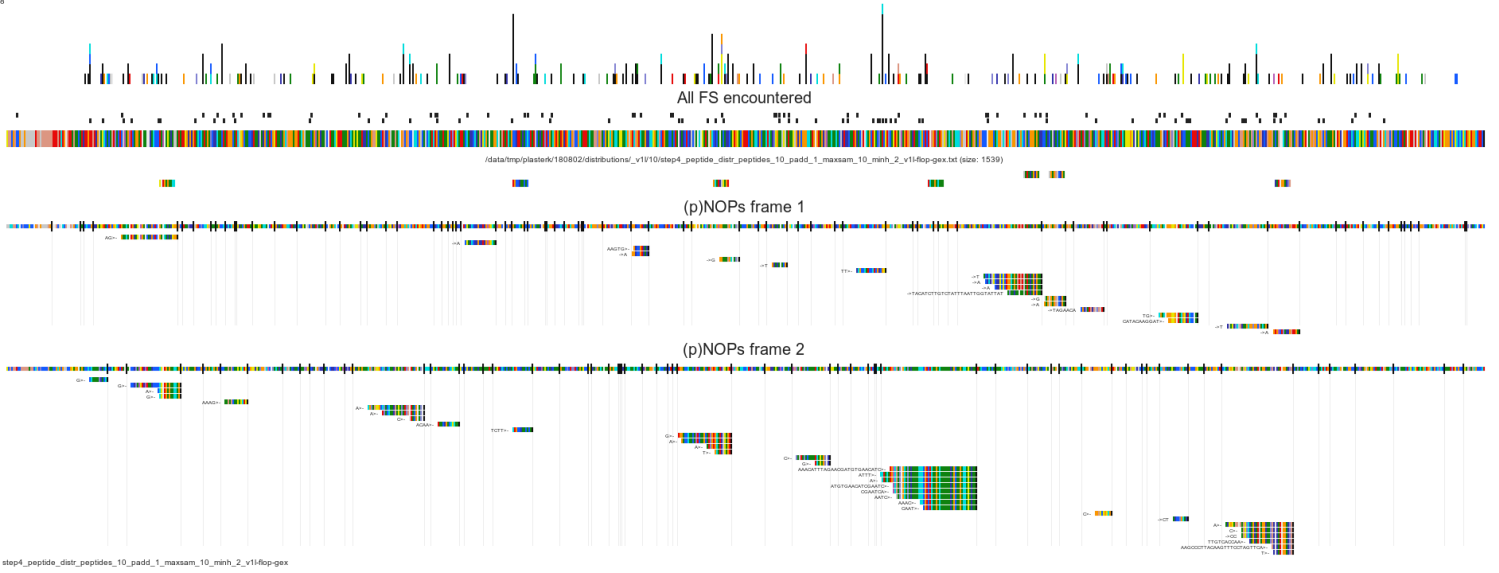

PIK3R1-NM\_181524  
Somatic SNVs

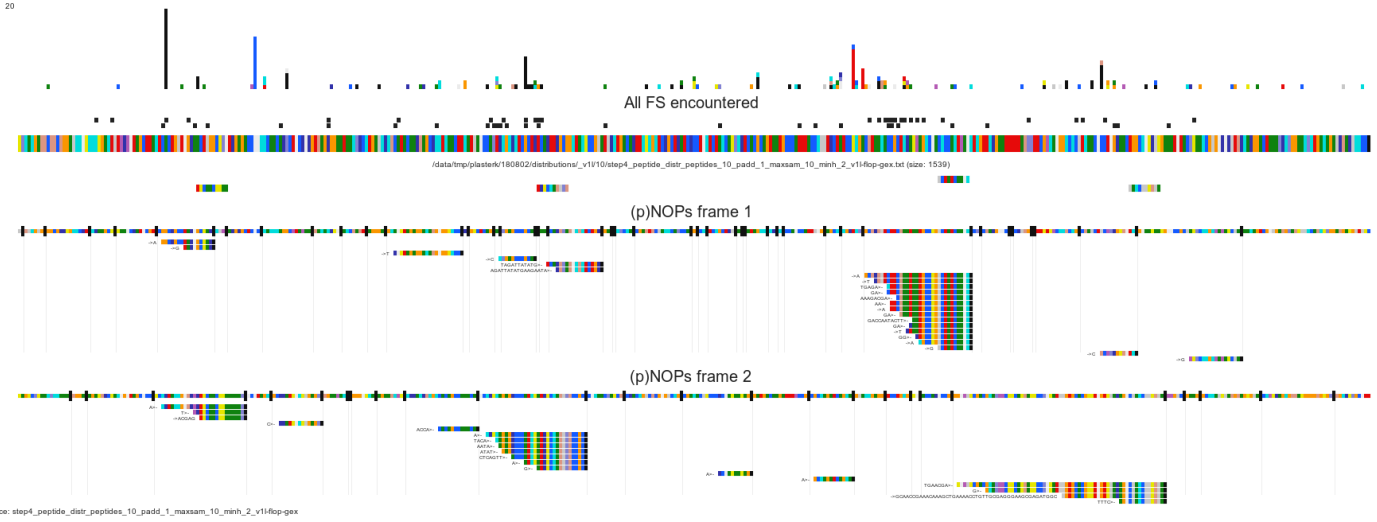

PTEN-NM\_000314  
Somatic SNVs

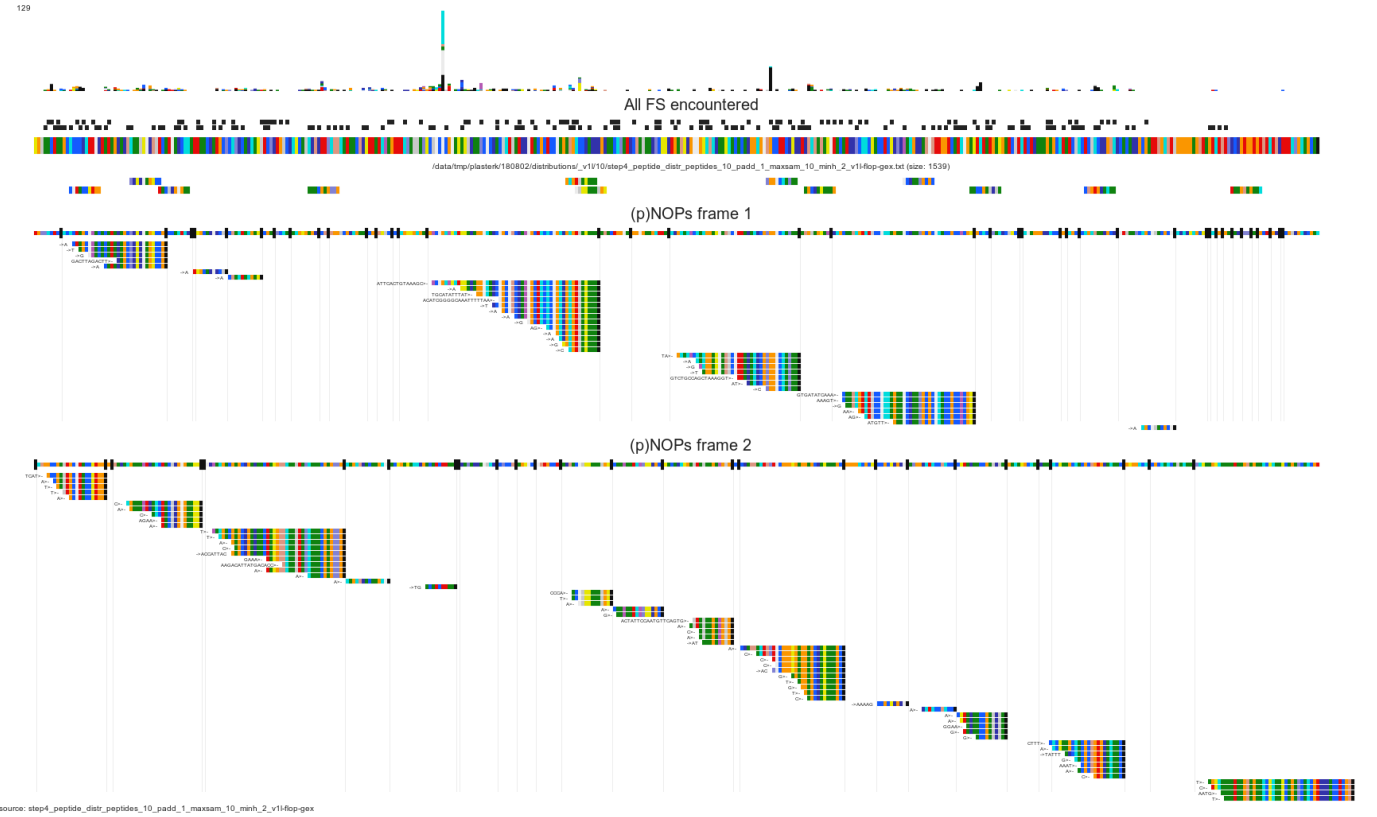

RNF43-NM\_001305545  
Somatic SNVs

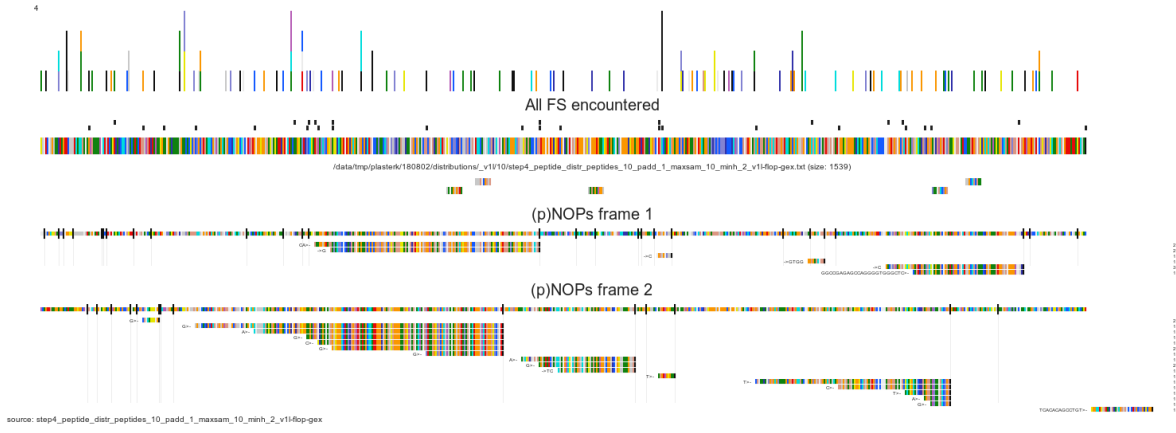

SOX9-NM\_000346  
Somatic SNVs

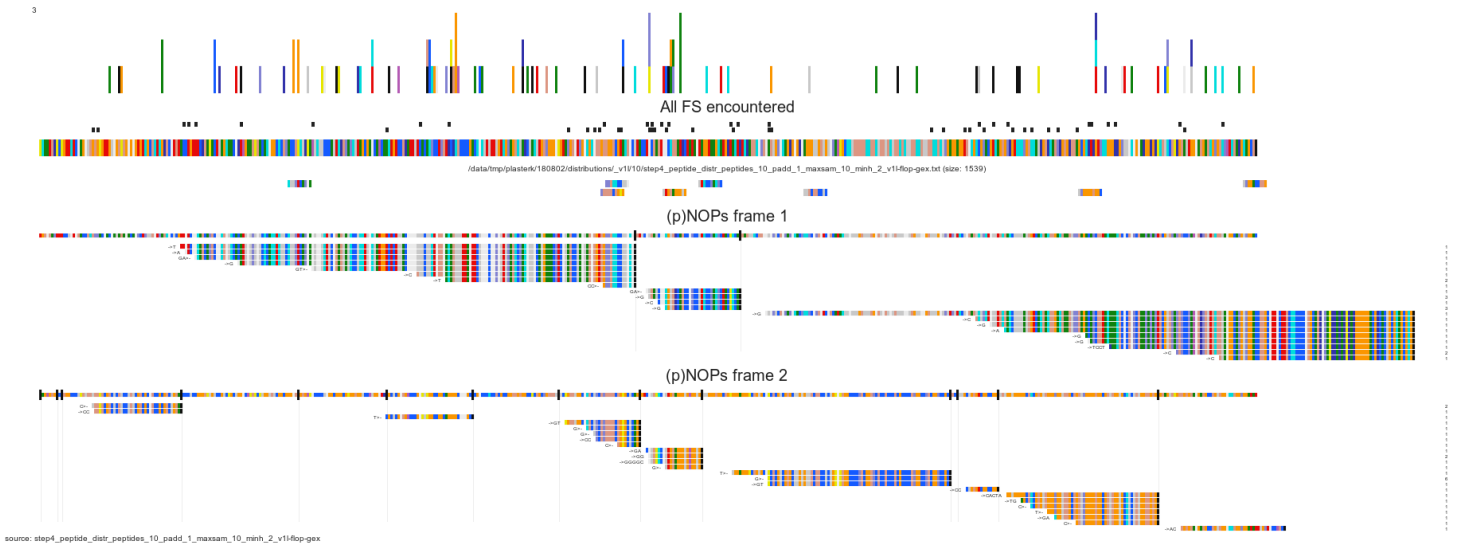

ZFP36L1-NM\_001244698  
Somatic SNVs

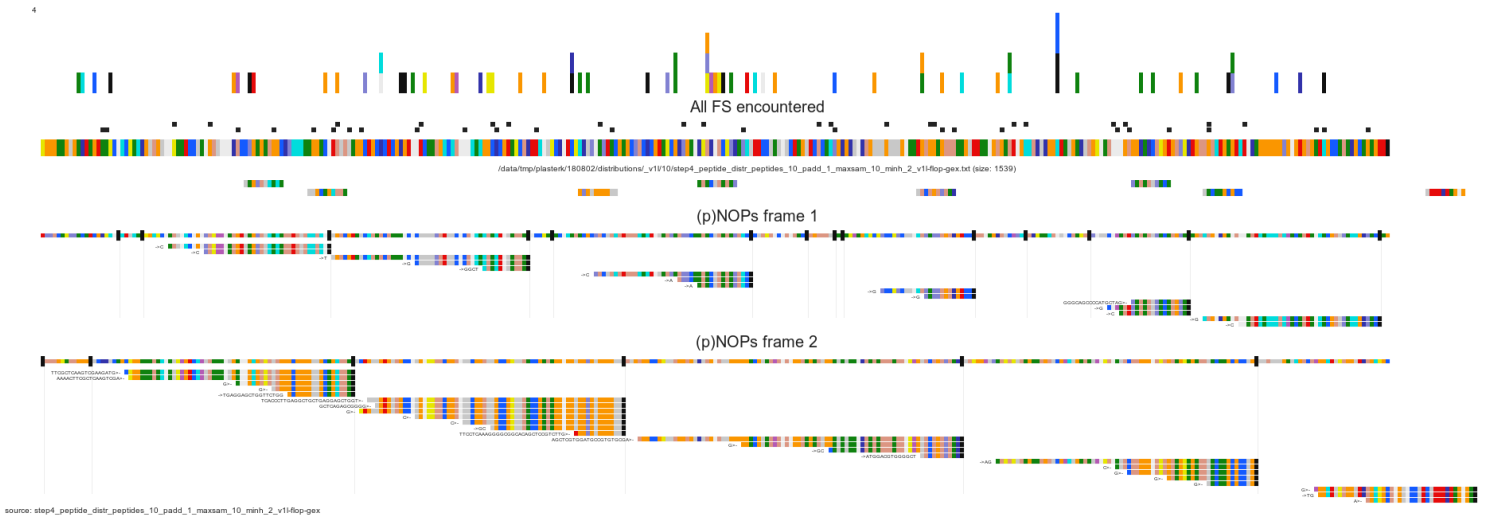

VHL-NM\_000551  
Somatic SNVs

6

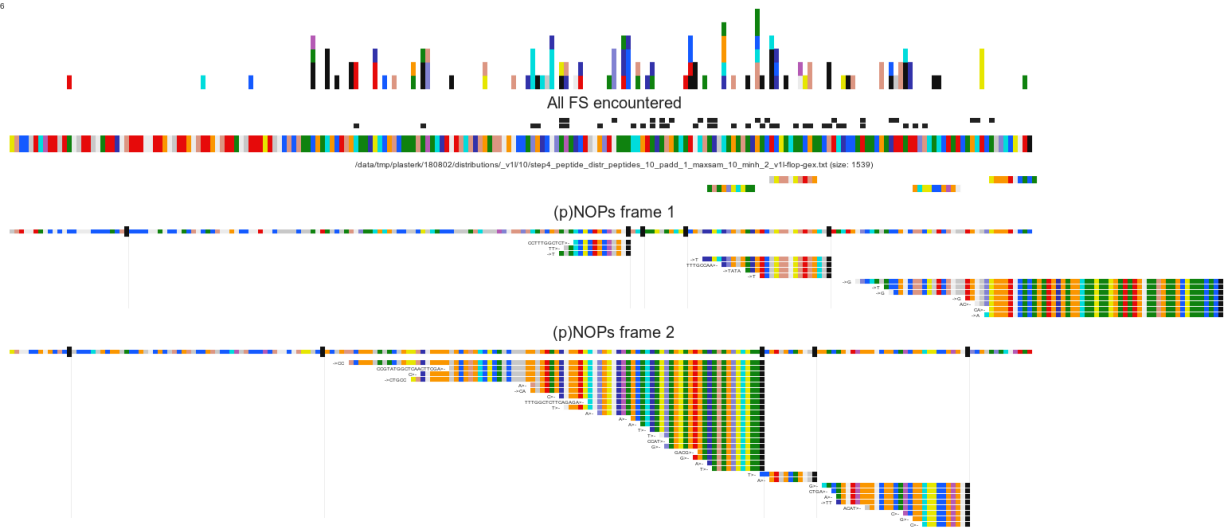

source: step4\_peptide\_dist\_peptides\_10\_padd\_1\_maxsam\_10\_minh\_2\_v14log-gex

ATRX-NM\_138270  
Somatic SNVs

10

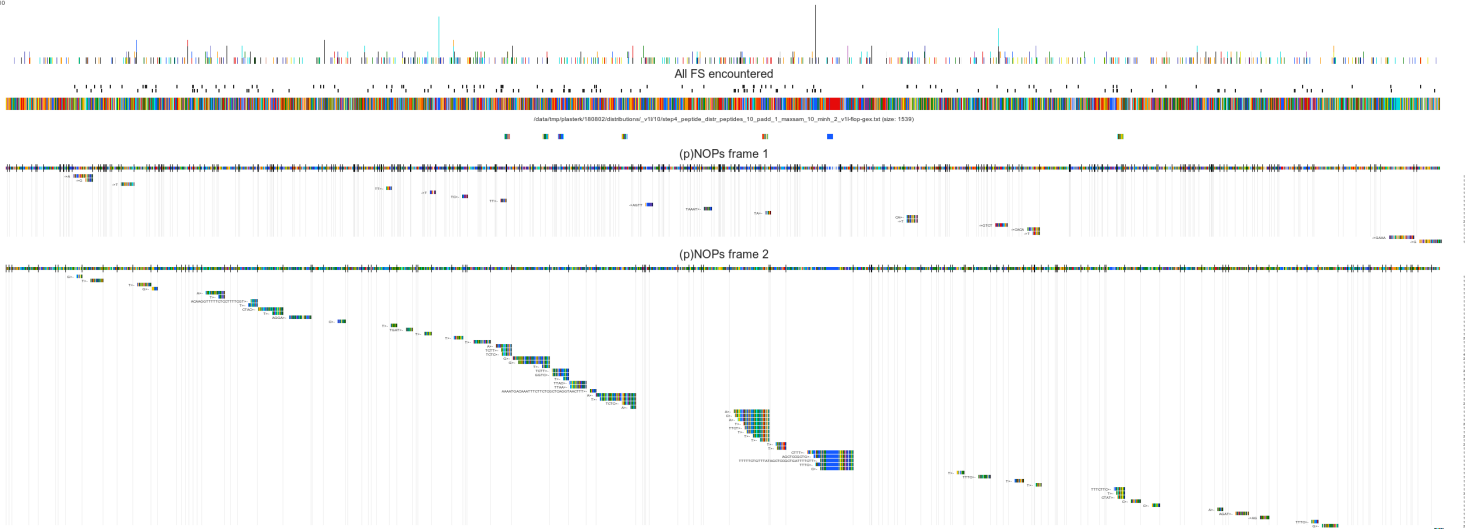

source: step4\_peptide\_dist\_peptides\_10\_padd\_1\_maxsam\_10\_minh\_2\_v14log-gex

**a**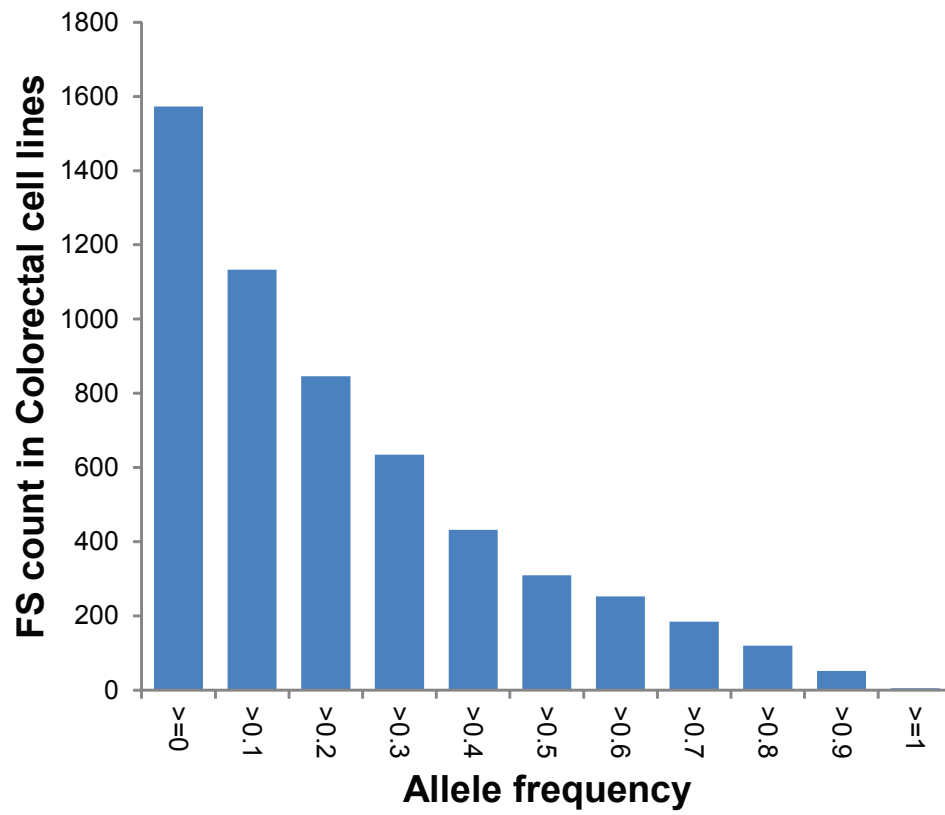**b**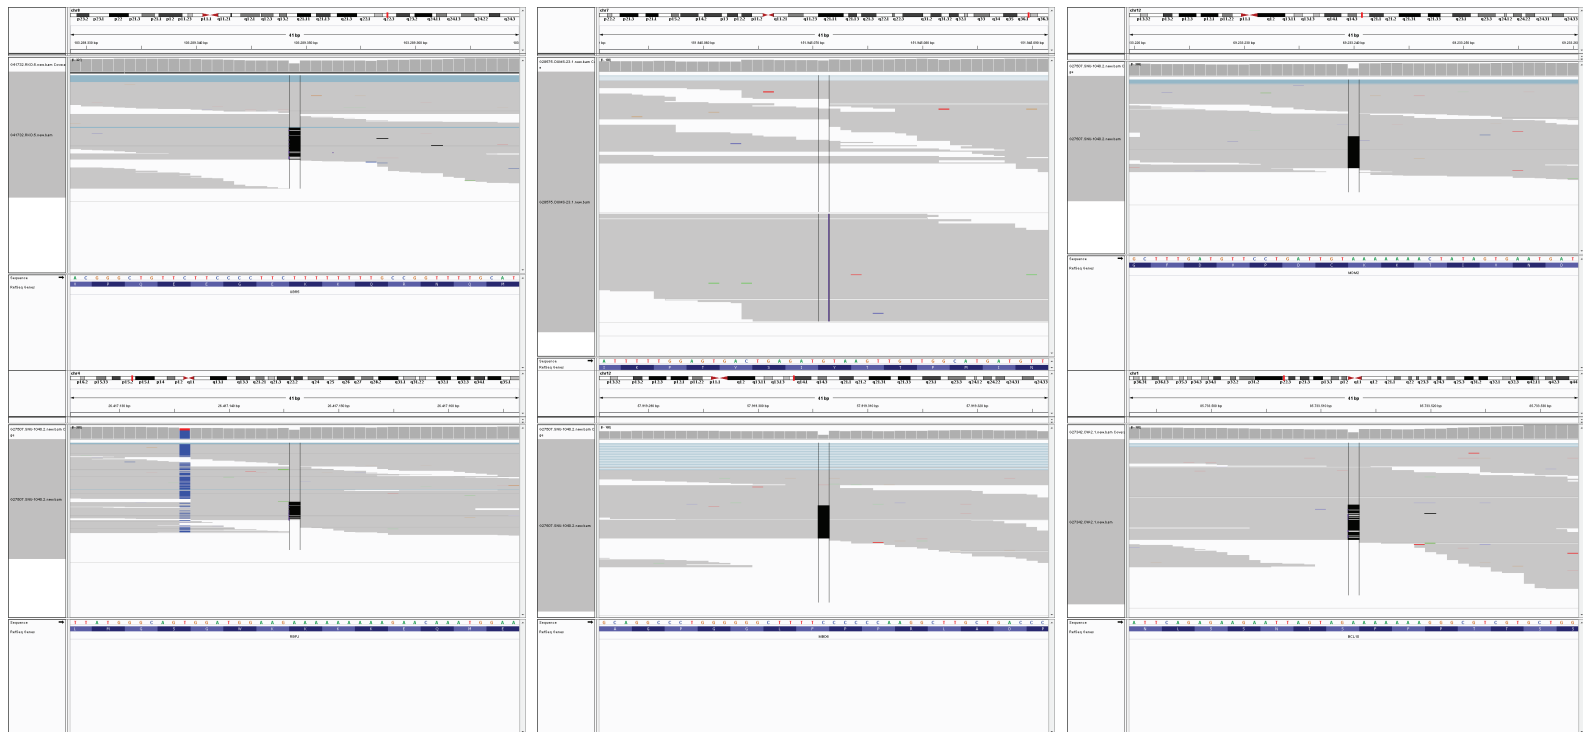

**Supplemental Figure 2. Frame shift presence in mRNA from 58 CCLE colorectal cancer cell lines**  
 a. Cumulative counting of RNaseq allele frequency (Samtools mpileup (XO:1/all)) at the genomic position of DNA detected frame shift mutations.  
 b. IGV examples of frame shift mutations in the BAM files of CCLE cell lines

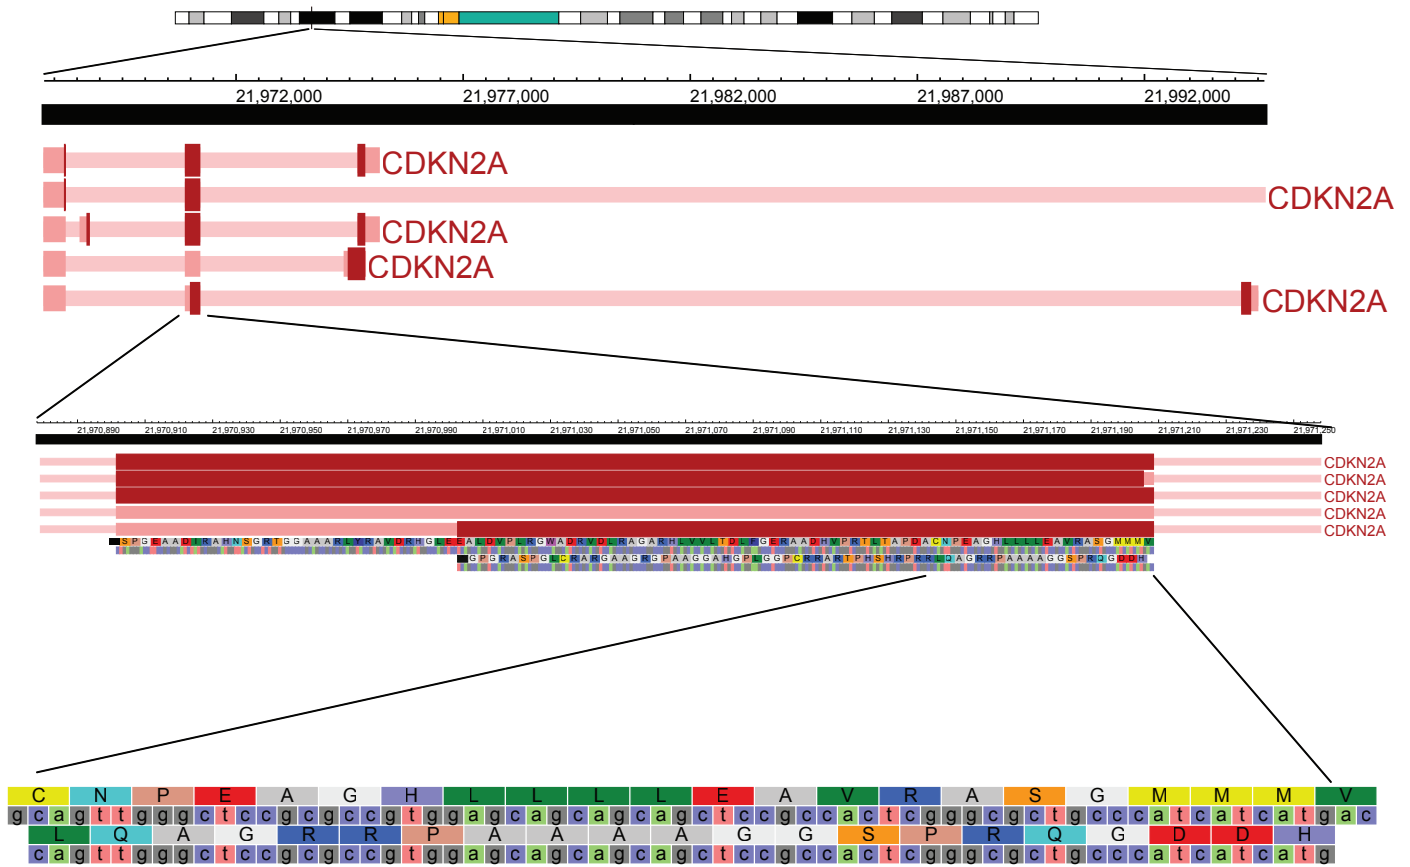

### Supplemental Figure 3. Example of normal isoforms, using shifted frame

Genome model of CDKN2A with the different isoforms are shown on the minus strand of the genome. Zoom of the middle exon depicts the 2 reading frames that are encountered in the different isoforms.





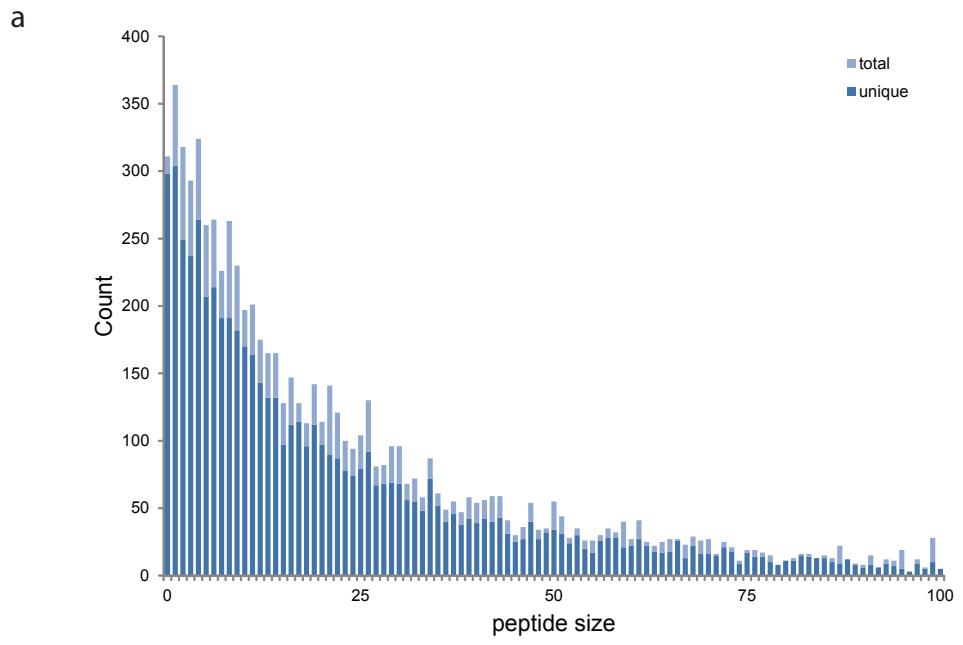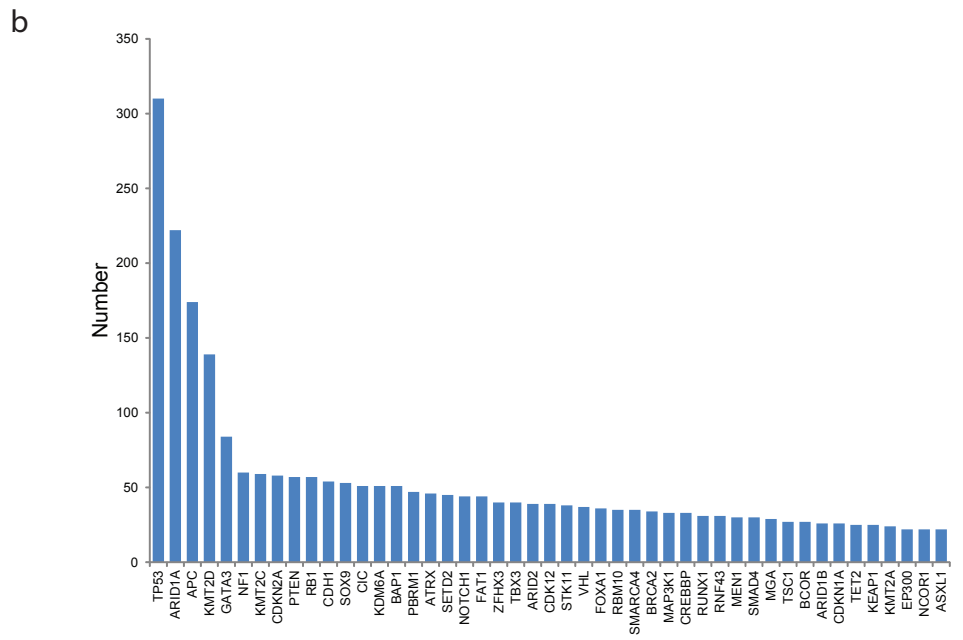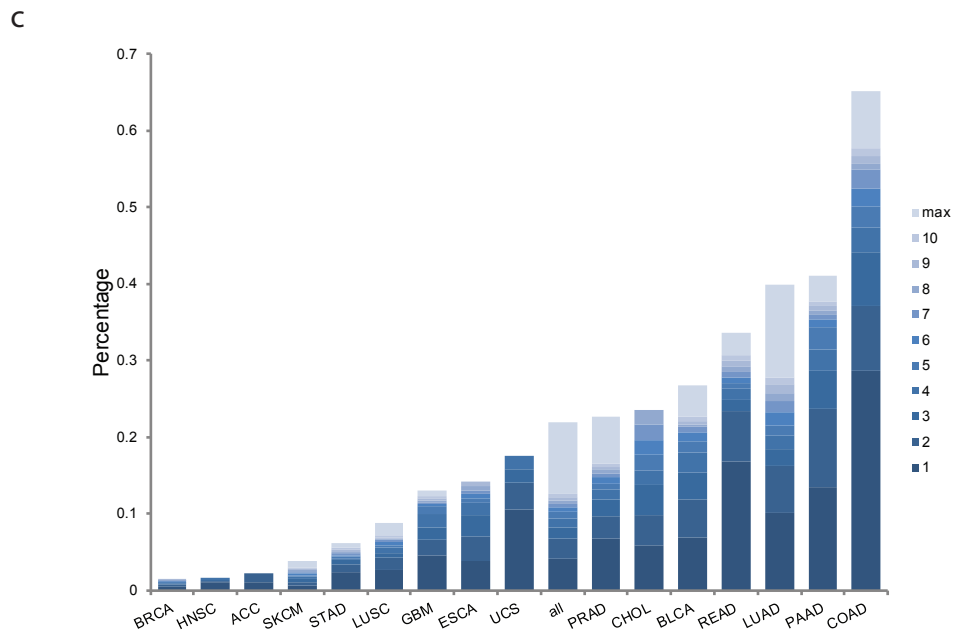

d

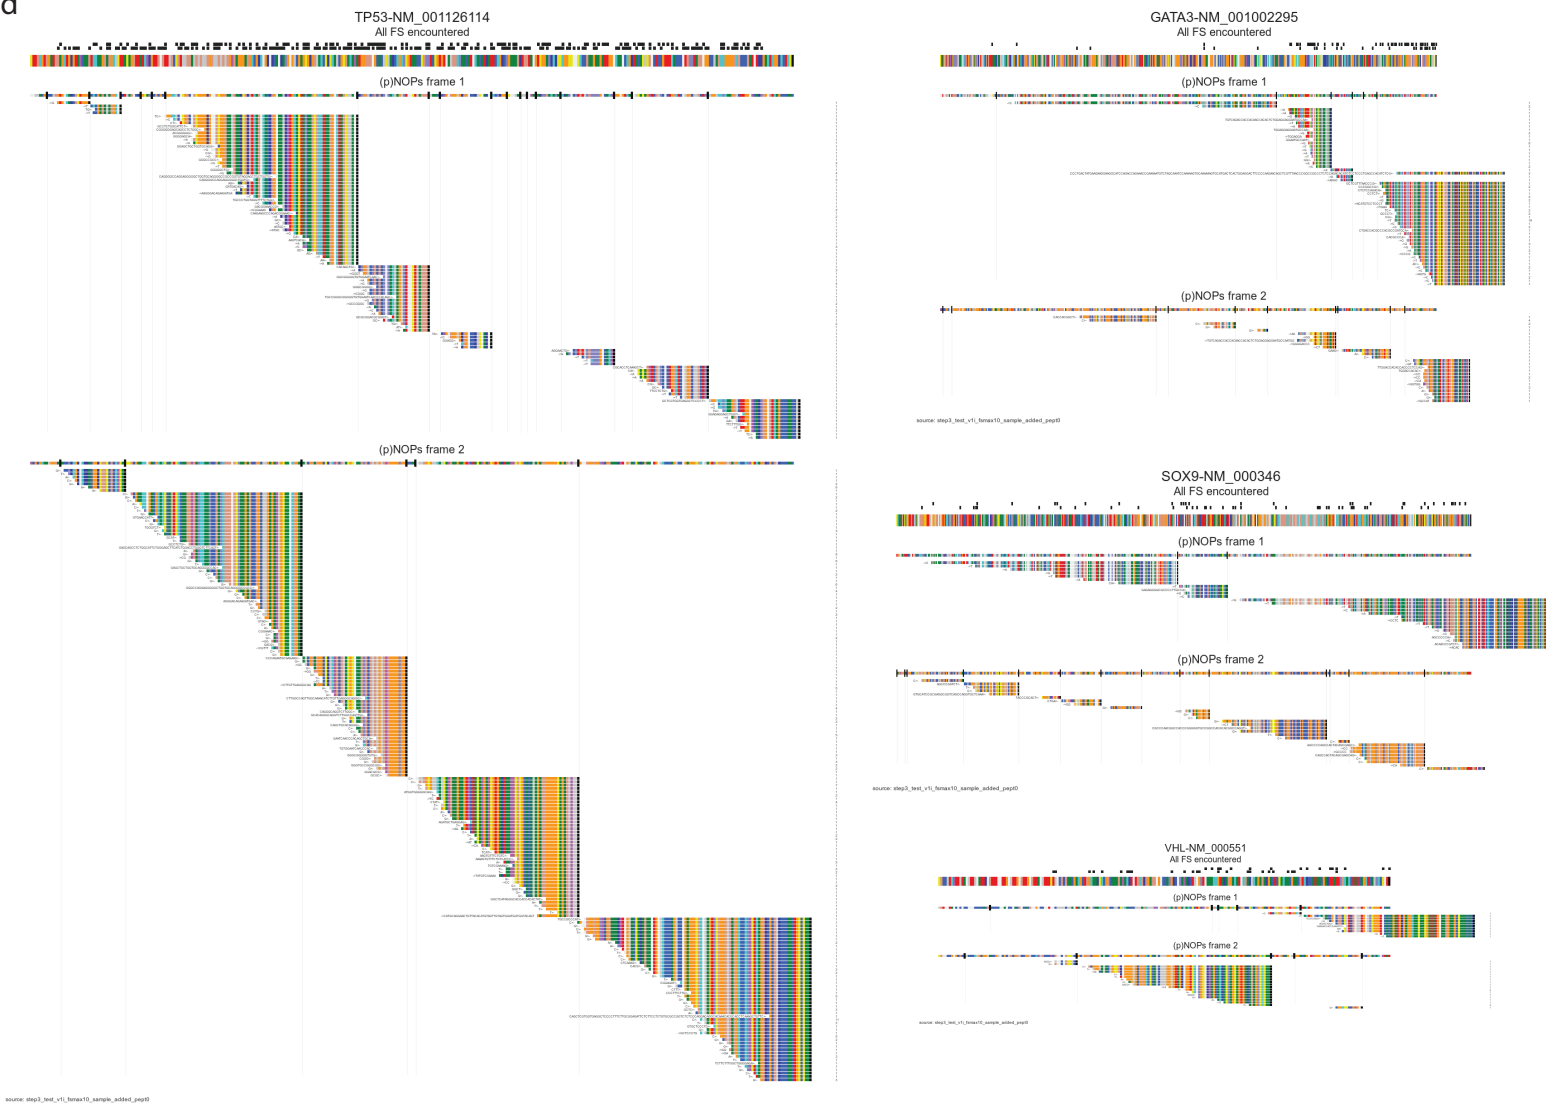

**Supplemental Figure 5. NOPs in the MSK-IMPACT study**

Frame shift analysis in the targeted sequencing panel of the MSK-IMPACT study, covering up to 410 genes in more 10,129 patients (with at least 1 somatic mutation). a. FS peptide length distribution, b. Gene count of patients containing NOPs of 10 or more amino acids. c. Ratio of patients separated by tumor type that possess a neo epitope using optimally selected peptides for genes encountered most often within a cancer. Coloring represents the ratio, using 1, 2 .. 10 genes, or using all encountered genes (lightest shade) d. Examples of NOPs for 4 genes.
